# Supplementary material
Source: PubMed Central journal article supplement (PMC3321095)
Supplement: NIHMS362311-supplement-1_si_001.pdf [file NIHMS362311-supplement-1_si_001.pdf]

## Supplemental Methods

**Tryptic digestion.** Proteins aliquots, approximately 10 µg for each sample, were simultaneously denatured and their disulfide bond were reduced through the addition of a 10 mM ammonium bicarbonate solution (pH = 7.4) containing 6 M guanidine hydrochloride and 10 mM dithiothreitol and incubating the samples for 1 hr at 60° C. After allowing the samples to cool to the room temperature, alkylation was accomplished through the addition of iodoacetamide resulting in a final concentration of 25 mM. This reaction was performed for 1 hr in the dark. Prior to the addition of trypsin, the proteins were desalted using Amicon Ultra centrifugal filters (0.5 ml capacity, 10 kDa MWCO). Digestion was accomplished by the addition of a 0.25-µg amount of proteomics-grade trypsin and incubating the samples for 24 hr at 37° C.

**LC-MS.** Approximately 200 ng of each sample were injected (in mobile phase A), separated by nano-flow LC and detected and characterized using an LTQ FT-MS, using the dynamic exclusion function to avoid repeatedly analyzing previously-detected peptides within a 2-min time window. The samples were separated using a 75 µm ID x 15 cm capillary packed with 5 µm mean diameter Michrome Bioresources MagicQ C<sub>18</sub> silica (mean pore size: 100 angstroms). The peptides were separated using a 45-min linear gradient, ranging from 5%-55%, mobile phase B. In this work, mobile phase A consisted of 95%/5%/0.1 water/acetonitrile/formic acid and mobile phase B was composed of 95%/5%/0.1% acetonitrile/water/formic acid.

**Database Searching.** The resulting data were searched against the human Swiss Prot database using Mascot 2.0 as the search engine. Fixed modifications were set as carbamidylmethylation and methionine was selected as a variable modification. Two missed tryptic cleavages were allowed. In this study, the MS mass tolerance was set at 0.02 Da for the FT-MS analysis, while

the tandem MS fragments were given a tolerance of 0.8 Da, since they were analyzed only by the ion trap, but not the FT-MS. Following the database searching, the identified peptides were parsed using a minimum ion score of 30 and selecting only the bold red peptides.
